# Supplementary material
Source: PubMed Central journal article supplement (PMC2765043)

## Supplemental Material

### Supplemental Figure 1. IFN- $\gamma$ deficiency causes premature aortic rupture and death

Representative necropsy of *ApoE*<sup>-/-</sup>/*Ifng*<sup>-/-</sup> mouse. Arrow indicates retroperitoneal hematoma.

### Supplemental Figure 2. IFN- $\gamma$ deficiency did not alter aortic medial structure

Measurements of (A) aortic medial area and (B) aortic medial thickness are displayed as means and SEMs from age-matched *ApoE*<sup>-/-</sup>/*Ifng*<sup>+/+</sup> (open boxes) and *ApoE*<sup>-/-</sup>/*Ifng*<sup>-/-</sup> (closed boxes) mice (n = 10 mice/group). Data were analyzed by Student's *t* test. No significant differences were determined between the groups.

### Supplemental Figure 3. CXCL10 deficiency causes premature aortic rupture and death

Representative necropsy of *ApoE*<sup>-/-</sup>/*Cxcl10*<sup>-/-</sup> mouse. Arrows indicate thoracic and retroperitoneal hematomas with adjacent aneurysms.

### Supplemental Figure 4. CXCL10 deficiency attenuates AngII-induced T cell infiltration into the vascular wall

Thy 1.2 immunostaining analysis of aneurysms from *ApoE*<sup>-/-</sup>/*Cxcl10*<sup>+/+</sup> or *ApoE*<sup>-/-</sup>/*Cxcl10*<sup>-/-</sup> mice infused with AngII (1000 ng·kg<sup>-1</sup>·min<sup>-1</sup>) or saline for 28 days.

## Supplemental Table 1

**Table 1. Analysis of Aortic Ring Contractility in *Ifng*<sup>+/+</sup> and *Ifng*<sup>-/-</sup> Mice.**

| IFN- $\gamma$<br>Genotype | Agonist | Log EC <sub>50</sub> |
|---------------------------|---------|----------------------|
| +/+                       | PE      | 2.032 $\pm$ 0.055    |
|                           | KCl     | 0.580 $\pm$ 0.053    |
| -/-                       | PE      | 2.076 $\pm$ 0.055    |
|                           | KCl     | 0.622 $\pm$ 0.089    |

Data represent means  $\pm$  SEM.

# SUPPLEMENTAL MATERIAL

## Supplemental Figure 1

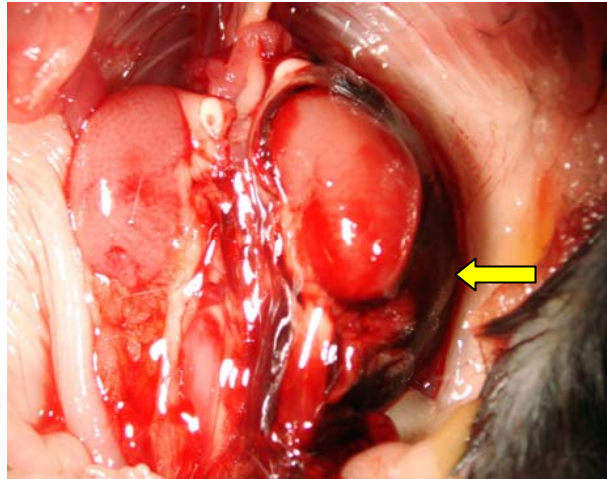

*Ifng*<sup>-/-</sup>

# Supplemental Figure 2

**A**

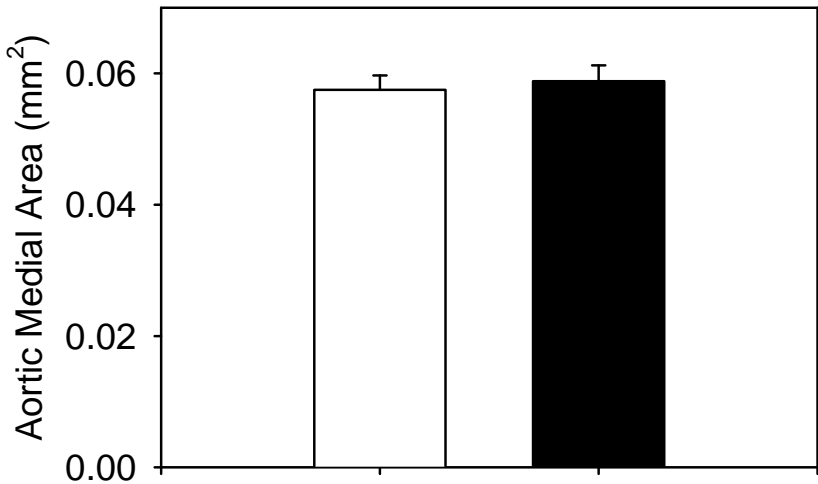

**B**

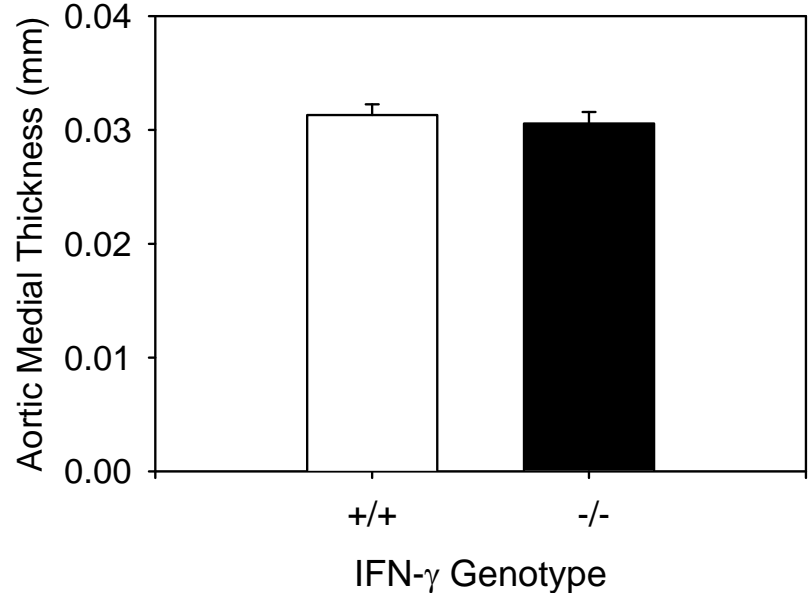

# Supplemental Figure 3

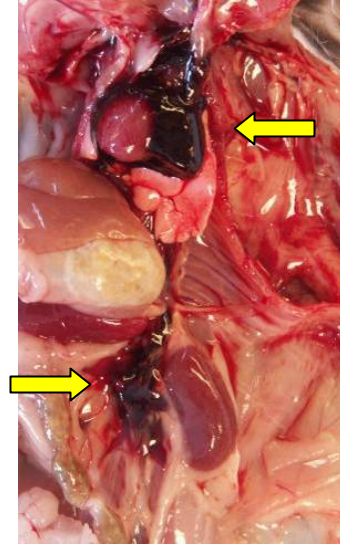

***Cxcl10*<sup>-/-</sup>**

# Supplemental Figure 4

*Cxcl10*<sup>+/+</sup>

*Cxcl10*<sup>-/-</sup>

Thy-1.2

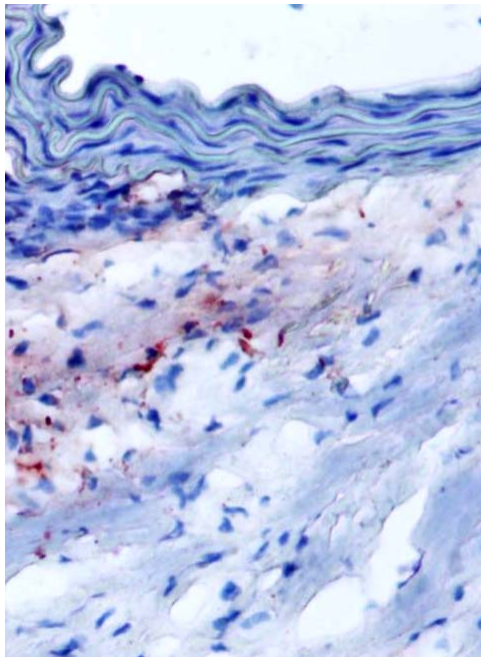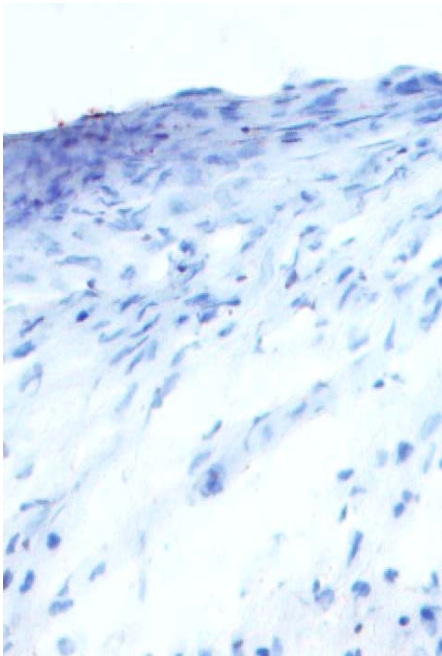

Supplement: NIHMS126494-supplement-1.pdf [file NIHMS126494-supplement-1.pdf]
